# Supplementary material for: Characteristics of Specialty Mental Health Provider Networks in Oregon Medicaid
Source: Atypon-hosted journal article supplement (doi:10.1176/appi.ps.202100623), 2022-06-30
Supplement: appi.ps.202100623.ds001.pdf [file appi.ps.202100623.ds001.pdf]

Appendix A. Overview of patient cohort selection

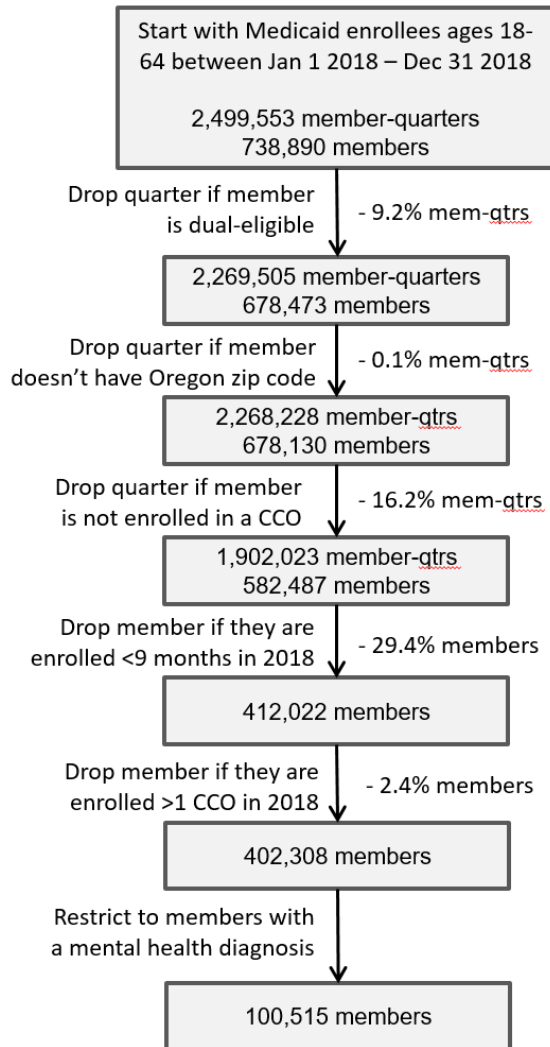

Appendix B. Taxonomy codes for mental health provider types

| Provider type                                           | Taxonomy codes                                                                                                                                                                                                                                                                                 | Prescribing provider |
|---------------------------------------------------------|------------------------------------------------------------------------------------------------------------------------------------------------------------------------------------------------------------------------------------------------------------------------------------------------|----------------------|
| Psychiatrist                                            | 2084A0401X, 2084B0002X, 2084B0040X, 2084F0202X, 2084N0600X, 2084P0015X, 2084P0800X, 2084P0802X, 2084P0804X, 2084P0805X                                                                                                                                                                         | Yes                  |
| Nurse practitioner specializing in mental health        | 363LP0808X                                                                                                                                                                                                                                                                                     | Yes                  |
| Clinical Nurse Specialist specializing in mental health | 364SP0807X, 364SP0808X, 364SP0809X, 364SP0810X, 364SP0811X, 364SP0812X, 364SP0813X                                                                                                                                                                                                             | No                   |
| Psychologist                                            | 103G00000X, 103GC0700X, 103T00000X, 103TA0400X, 103TA0700X, 103TB0200X, 103TC0700X, 103TC1900X, 103TC2200X, 103TE1000X, 103TE1100X, 103TF0000X, 103TF0200X, 103TH0004X, 103TH0100X, 103TM1700X, 103TM1800X, 103TP0016X, 103TP0814X, 103TP2700X, 103TP2701X, 103TR0400X, 103TS0200X, 103TW0100X | No                   |
| Counselors and therapists                               | 101Y00000X, 101YA0400X, 101YM0800X, 101YP1600X, 101YP2500X, 101YS0200X, 102L00000X, 106H00000X                                                                                                                                                                                                 | No                   |
| Social workers                                          | 104100000X, 1041C0700X, 1041S0200X                                                                                                                                                                                                                                                             | No                   |

Appendix C. Characteristics of enrollees with mental health conditions, by CCO

|                             | <b>A</b>      | <b>B</b>     | <b>C</b>     | <b>D</b>     | <b>E</b>     | <b>F</b>      | <b>G</b>      | <b>H</b>     | <b>I</b>     | <b>J</b>     | <b>K</b>     | <b>L</b>   | <b>M</b>     | <b>N</b>     | <b>O</b>     |
|-----------------------------|---------------|--------------|--------------|--------------|--------------|---------------|---------------|--------------|--------------|--------------|--------------|------------|--------------|--------------|--------------|
|                             | <b>N =</b>    | <b>N =</b>   | <b>N =</b>   | <b>N =</b>   | <b>N =</b>   | <b>N =</b>    | <b>N =</b>    | <b>N =</b>   | <b>N =</b>   | <b>N =</b>   | <b>N =</b>   | <b>N =</b> | <b>N =</b>   | <b>N =</b>   | <b>N =</b>   |
|                             | <b>13,309</b> | <b>2,694</b> | <b>4,723</b> | <b>2,409</b> | <b>5,051</b> | <b>10,103</b> | <b>35,994</b> | <b>6,384</b> | <b>3,652</b> | <b>2,091</b> | <b>1,188</b> | <b>933</b> | <b>3,597</b> | <b>6,074</b> | <b>2,313</b> |
| Age* (yrs), mean            | 38.11         | 39.35        | 38.07        | 37.47        | 38.42        | 37.54         | 38.15         | 38.19        | 38.20        | 38.04        | 37.91        | 39.84      | 38.78        | 38.12        | 40.27        |
| SD                          | 12.77         | 12.86        | 12.66        | 12.53        | 12.72        | 12.83         | 12.37         | 12.68        | 12.65        | 12.80        | 13.20        | 13.52      | 12.73        | 12.67        | 13.19        |
| Female gender* (%)          | 65.9          | 68.3         | 68.7         | 67.2         | 66.9         | 68.2          | 64.0          | 66.8         | 66.8         | 65.6         | 67.8         | 67.0       | 68.2         | 67.2         | 66.9         |
| Race-ethnicity* (%)         |               |              |              |              |              |               |               |              |              |              |              |            |              |              |              |
| White                       | 53.3          | 62.3         | 57.1         | 51.3         | 55.2         | 49.1          | 49.2          | 57.5         | 51.9         | 61.9         | 50.3         | 57.3       | 57.3         | 56.9         | 61.0         |
| Hispanic                    | 2.2           | 1.7          | 7.2          | 4.2          | 3.4          | 7.1           | 4.0           | 2.0          | 3.0          | 4.9          | 6.8          | 1.6        | 1.4          | 2.7          | 2.2          |
| Black                       | 1.2           | 0.6          | 0.7          | 0.7          | 0.7          | 1.0           | 5.2           | 0.7          | 0.7          | 0.9          | 0.5          | 0.5        | 0.6          | 0.4          | 0.5          |
| AI/AN                       | 1.1           | 0.9          | 2.3          | 1.2          | 1.2          | 1.3           | 1.1           | 1.3          | 1.3          | 2.4          | 1.2          | 1.4        | 0.9          | 1.2          | 1.3          |
| Other/unknown               | 42.2          | 34.5         | 32.8         | 42.6         | 39.6         | 41.4          | 40.5          | 38.5         | 43.1         | 29.8         | 41.2         | 39.1       | 39.8         | 38.8         | 35.0         |
| Urban residence* (%)        | 79.0          | 0.2          | 0.0          | 7.1          | 38.8         | 73.3          | 94.8          | 50.0         | 72.4         | 0.0          | 0.3          | 0.0        | 0.0          | 45.7         | 0.0          |
| Months enrolled*, mean      | 11.62         | 11.59        | 11.54        | 11.51        | 11.62        | 11.63         | 11.59         | 11.58        | 11.59        | 11.58        | 11.53        | 11.57      | 11.63        | 11.56        | 11.62        |
| SD                          | 0.94          | 0.97         | 1.01         | 1.04         | 0.93         | 0.92          | 0.96          | 0.97         | 0.96         | 0.98         | 1.01         | 0.97       | 0.93         | 0.99         | 0.93         |
| Serious Mental Illness* (%) | 13.2          | 12.5         | 12.6         | 12.3         | 11.4         | 12.7          | 14.7          | 13.7         | 12.0         | 14.8         | 14.7         | 10.8       | 13.4         | 9.3          | 11.9         |
| Total CDPS conditions, mean | 2.42          | 2.54         | 2.52         | 2.56         | 2.36         | 2.45          | 2.42          | 2.46         | 2.42         | 2.51         | 2.31         | 2.32       | 2.65         | 2.33         | 2.71         |
| SD                          | 1.76          | 1.87         | 1.79         | 1.88         | 1.78         | 1.84          | 1.85          | 1.81         | 1.79         | 1.77         | 1.71         | 1.81       | 1.89         | 1.71         | 1.90         |

Notes: \* denotes a statistically significant difference across CCOs (p<0.001). Individuals were identified as having serious mental illness if they had at least one claim for inpatient hospitalization, partial hospitalization in a psychiatric facility, or psychiatric residential care; or if enrollees had two or more other claims for the following primary diagnoses on different dates: Schizophrenia (F20, F25), Bipolar I (F30, F31.0, F31.78), Major Depressive Disorders (F32.2, F32.3, F33.2, F33.3), and other Schizophrenia Spectrum or Psychotic Disorders (F28). AI/AN = American Indian/Alaska Native. CDPS = Chronic Illness and Disability Payment System. The size of the mental health population in each CCO includes all enrollees with any mental health diagnosis matching our inclusion criteria.

Appendix D. Measures of continuity and concentration, by mental health conditions and provider type

| C<br>C<br>O | Serious mental illness                             |                         |                           |      |                         | Other mental health conditions                     |                         |                           |      |                         |
|-------------|----------------------------------------------------|-------------------------|---------------------------|------|-------------------------|----------------------------------------------------|-------------------------|---------------------------|------|-------------------------|
|             | Continuity<br>(% of patients with<br>3+ providers) |                         | Continuity<br>(UPC Index) |      | Concentrati<br>on (HHI) | Continuity<br>(% of patients with<br>3+ providers) |                         | Continuity<br>(UPC Index) |      | Concentrati<br>on (HHI) |
|             | Prescri<br>bers                                    | Non-<br>prescrib<br>ers | Mean                      | SD   |                         | Prescrib<br>ers                                    | Non-<br>prescrib<br>ers | Mean                      | SD   |                         |
| A           | 3.6                                                | 16.2                    | 0.73                      | 0.25 | 126                     | 1.3                                                | 3.9                     | 0.86                      | 0.22 | 72                      |
| B           | 0.6                                                | 7.0                     | 0.75                      | 0.22 | 399                     | 0.0                                                | 1.3                     | 0.88                      | 0.2  | 188                     |
| C           | 0.8                                                | 10.3                    | 0.73                      | 0.24 | 298                     | 0.8                                                | 3.0                     | 0.86                      | 0.22 | 127                     |
| D           | 0.0                                                | 23.1                    | 0.77                      | 0.24 | 528                     | 0.3                                                | 4.8                     | 0.87                      | 0.21 | 340                     |
| E           | 4.0                                                | 19.1                    | 0.65                      | 0.25 | 221                     | 0.6                                                | 4.9                     | 0.87                      | 0.22 | 68                      |
| F           | 1.6                                                | 14.8                    | 0.73                      | 0.22 | 173                     | 0.4                                                | 4.2                     | 0.85                      | 0.22 | 82                      |
| G           | 5.7                                                | 14.1                    | 0.69                      | 0.25 | 44                      | 1.7                                                | 3.2                     | 0.85                      | 0.23 | 18                      |
| H           | 4.4                                                | 3.1                     | 0.75                      | 0.23 | 423                     | 4.2                                                | 0.8                     | 0.87                      | 0.22 | 105                     |
| I           | 4.9                                                | 5.4                     | 0.7                       | 0.24 | 357                     | 1.2                                                | 2.1                     | 0.85                      | 0.22 | 133                     |
| J           | 1.1                                                | 4.8                     | 0.69                      | 0.25 | 768                     | 0.0                                                | 2.9                     | 0.83                      | 0.24 | 360                     |
| K           | 3.7                                                | 12.7                    | 0.69                      | 0.23 | 1387                    | 0.0                                                | 3.4                     | 0.87                      | 0.21 | 280                     |
| L           | 0.0                                                | 23.1                    | 0.71                      | 0.24 | 467                     | 1.3                                                | 7.1                     | 0.86                      | 0.23 | 248                     |
| M           | 5.6                                                | 0.8                     | 0.75                      | 0.23 | 670                     | 0.5                                                | 0.4                     | 0.87                      | 0.21 | 327                     |
| N           | 2.7                                                | 17.0                    | 0.68                      | 0.24 | 303                     | 0.4                                                | 3.5                     | 0.83                      | 0.24 | 100                     |
| O           | 0.0                                                | 11.9                    | 0.78                      | 0.21 | 1196                    | 0.0                                                | 3.4                     | 0.89                      | 0.2  | 508                     |

Notes: In sensitivity analyses, we calculated measures of continuity and concentration for those with serious mental illness and other mental health conditions. All measures were assessed at the level of the CCO health plan. Individuals were identified as having serious mental illness if they had at least one claim for inpatient hospitalization, partial hospitalization in a psychiatric facility, or psychiatric residential care; or if enrollees had two or more other claims for the following primary diagnoses on different dates: Schizophrenia (F20, F25), Bipolar I (F30, F31.0-F31.78), Major Depressive Disorders (F32.2, F32.3, F33.2, F33.3), and other Schizophrenia Spectrum or Psychotic Disorders (F28). Other mental health conditions included enrollees who did not meet the above criteria for SMI, but who had primary psychiatric diagnoses listed in Clinical Classification System Refined categories MBD001-MBD013, MBD027, or EXT021. An additional measure of continuity was calculated as the percentage of patients with at least 3 providers, and was calculated separately for mental health prescribers and non-prescribers. UPC was also calculated separately for prescribers and non-prescribers. UPC=Usual Provider Continuity, HHI=Herfindahl-Hirschman Index, SD=standard deviation

## Appendix E. Correlation between additional network measures

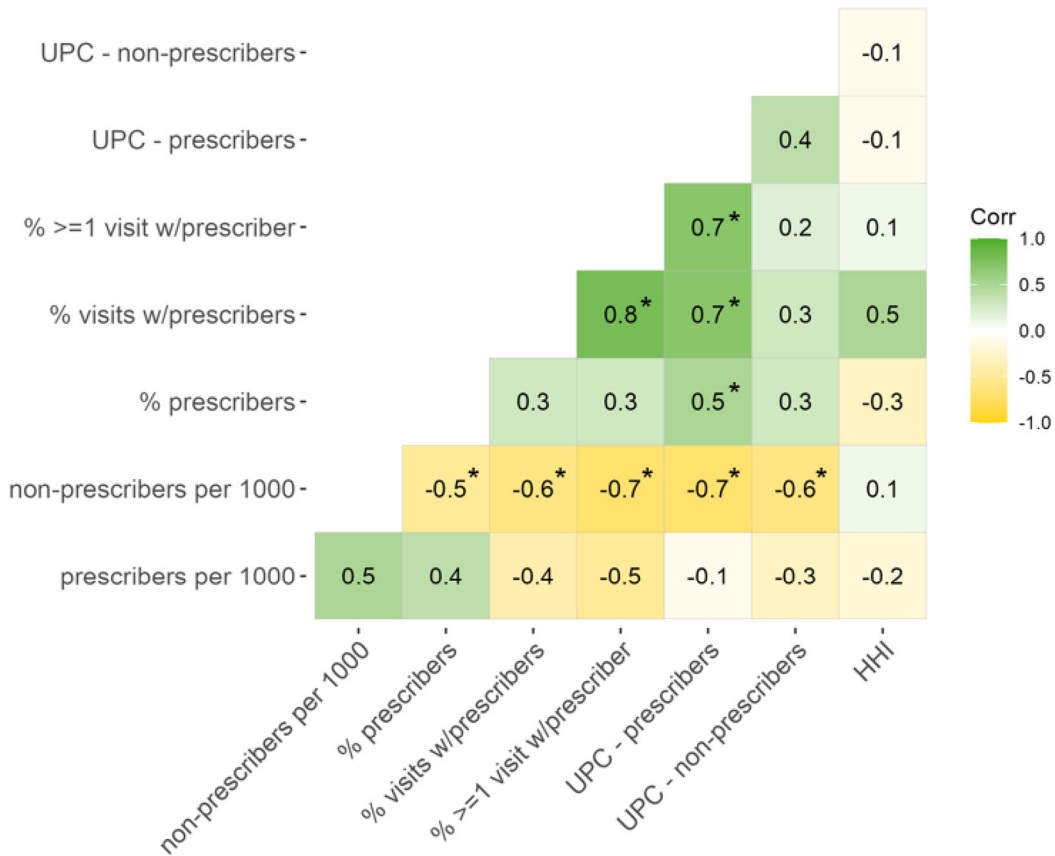

Notes: In sensitivity analyses, the relationship between additional network measures was assessed. In particular, UPC and provider-to-enrollee ratio was calculated separately for prescribers and non-prescribers. A measure assessing percent of enrollees with at least one visit with a prescriber was calculated to measure access to prescribers more directly. We find statistically significant positive correlations between measures of prescriber access and prescriber continuity, and statistically significant negative correlations between
